1 *file: Manuscript.docx*

06 January 2016

2

3

## Ecological and demographic drivers of jellyfish blooms

4

5

Josephine Goldstein<sup>1,2,3\*</sup>, Ulrich K. Steiner<sup>1,2</sup>

6

7

<sup>1</sup>Max-Planck Odense Center on the Biodemography of Aging, 5230 Odense M, Denmark

8

<sup>2</sup>Department of Biology, University of Southern Denmark, 5230 Odense M, Denmark

9

<sup>3</sup>Marine Biological Research Centre, University of Southern Denmark, 5300 Kerteminde, Denmark

10

11

\*Corresponding author; email: [jgoldstein@biology.sdu.dk](mailto:jgoldstein@biology.sdu.dk)

12

13

---

ABSTRACT: Jellyfish blooms are conspicuous demographic events with significant ecological

14

and socio-economic impact, as they alter aquatic food webs. Despite worldwide concern about

15

an increased frequency and intensity of jellyfish outbreaks, we are challenged to predict their

16

booms and busts. To overcome this issue, we need to identify the ecological drivers of jellyfish

17

blooms by taking into account the complex life cycle of scyphozoans (Cnidaria). Here we

18

present demographic rates of all life stages of the cosmopolitan jellyfish *Aurelia aurita* s. l.

19

within a stage-structured matrix model to investigate the life stage-dynamics of such complex

20

populations under different environments. We illustrate how booms and busts of the medusa

21

stage are highly influenced by non-medusa stage dynamics. We further point out increased food

22

availability as an important ecological driver of jellyfish blooms, as it can shift the population

23

structure of *A. aurita* away from the benthic polyp stage towards more medusae. Comparatively,

24

our projected climate change scenario caused low fluctuations in population density. Overall, our

25 study reveals ecological and demographic key variables that regulate the intensity and frequency  
26 of jellyfish blooms, and thereby contributes to a better understanding of anthropogenic drivers of  
27 jellyfish mass occurrence, including habitat eutrophication and climate change.

28

29 **KEY WORDS:** Jellyfish blooms · Biodemography · Global change · Matrix model · Population  
30 structure

31

32 **RUNNING HEAD:** Drivers of jellyfish blooms

33

34

35

## INTRODUCTION

36 Jellyfish blooms are demographic events in which the population density of one life stage, the  
37 medusa, shows distinct peaks over broad temporal and regional scales (Lucas et al. 2012). Such  
38 mass occurrence can have lasting ecological, economic and social consequences by changing the  
39 structure of pelagic ecosystems from fish-dominated to jellyfish-dominated food webs  
40 (Richardson et al. 2009). Jellyfish directly interfere with human activities; including tourism by  
41 stinging swimmers, fisheries by clogging nets, aquaculture by killing fish in net-pens, and power  
42 production by clogging cooling-water intake screens (Purcell et al. 2007, Purcell 2012). Concern  
43 about a global rise in jellyfish populations is widespread (Sanz-Martín et al. 2016), as jellyfish  
44 outbreaks are thought to be favored by several anthropogenic influences such as overfishing,  
45 eutrophication, habitat modification, species translocation and climate change (Richardson et al.  
46 2009, Purcell 2012).

47 Species involved in jellyfish blooms are primarily found within the cnidarian taxon  
48 Scyphozoa and feature complex life histories (Hamner & Dawson 2008). Their life cycles  
49 typically include a pelagic, sexually reproducing medusa and a benthic, asexually reproducing  
50 polyp stage (Lucas et al. 2012). Such life histories facilitate mass occurrence of the medusa stage  
51 and previous studies revealed high phenotypic plasticity of specific life stages under changing  
52 environmental conditions (e.g. Hamner & Jenssen 1974, Gröndahl 1989, Liu et al. 2009, Fu et al.  
53 2014). Despite mortality of the planula, polyp and ephyra stage could be of major importance for  
54 the development of medusa populations (Lucas 2001), information on the demographic rates  
55 involved in the complex life cycles of bloom-forming jellyfish has remained extremely scarce  
56 (e.g. Xie et al. 2015).

57 Quantification of demographic rates can identify the life stages that control jellyfish blooms  
58 in changing environments. Here, we used *Aurelia aurita* as model organism to reveal the basic  
59 demographic phenomena underlying jellyfish blooms and to point out how such drivers are  
60 influenced by environmental conditions. We first parameterized a stage structured matrix model  
61 based on data of all life stages (larvae, polyps, ephyrae and medusa) from laboratory experiments  
62 and the field. We compared the life history of *A. aurita* under different food levels with reference  
63 to two contrasting Danish water systems – the food limited Kerteminde Fjord/Kertinge Nor and  
64 the eutrophic Limfjorden – where zooplankton biomasses are  $<1-100 \mu\text{g C l}^{-1}$  and  $>10-1000 \mu\text{g}$   
65  $\text{C l}^{-1}$ , respectively (Nielsen et al. 1997, Møller & Riisgård 2007). In Kerteminde Fjord/Kertinge  
66 Nor, high density of the local *A. aurita* medusa population exhausts the available food resources  
67 and thereby restricts individual growth to maximum umbrella diameters of only 3-7 cm (Olesen  
68 et al. 1994, Nielsen et al. 1997). In Limfjorden, umbrella diameters of *A. aurita* medusae are in  
69 the range of 10-25 cm (Riisgård et al. 2012a, b), as is commonly observed in open coastal areas

70 (Möller 1980, Schneider 1989). We used our matrix model to evaluate jellyfish population  
71 growth rates with respect to changes in survival, stage-transitions or fecundity, i.e., reproductive  
72 rates. We further assessed the impact of high and low food conditions on population dynamics in  
73 a life-table response experiment (LTRE). Finally, we investigated the effects of climate change  
74 by exploring responses in population structure for a projected winter warming trend. Our results  
75 highlight the demographic drivers underlying jellyfish blooms and reveal the role of changing  
76 food web structures in combination with increased winter temperatures on their intensity and  
77 frequency. Such information is essential to predict the impact of anthropogenic influences on the  
78 life histories of the cosmopolitan jellyfish *A. aurita* and other jellyfish species with typical boom  
79 and bust population dynamics.

80

## 81 **MATERIALS AND METHODS**

### 82 **Model organism**

83 The common jellyfish *Aurelia aurita* s.l. (Scyphozoa, Cnidaria) belongs to an ubiquitous,  
84 cosmopolitan genus with several species and subspecies (Dawson 2003). *A. aurita* occurs in a  
85 variety of coastal and shelf sea environments, particularly in northwestern Europe, the Black Sea,  
86 Japan and parts of North America (Lucas 2001). Its complex life history (Fig. 1a) involves  
87 pelagic medusae that reproduce sexually and asexually reproducing benthic polyps. After sexual  
88 maturation, medusae produce large numbers of planula larvae (Ishii & Takagi 2003), which  
89 spend 12 h to 1 week in the water column (Lucas 2001) prior to settlement and metamorphosis  
90 into polyps on suitable hard substrate (Keen 1987, Holst & Jarms 2007). Polyps grow and  
91 reproduce asexually by several modes, including the production of well protected chitin-covered  
92 resting stages called podocysts (Arai 2009), budding of new polyps (Ishii & Watanabe 2003),

93 and the release of ephyrae by polyps through polydisc strobilation (Lucas et al. 2012). After  
94 asexual propagation, polyps return to the polyp stage and the development of ephyrae into  
95 sexually mature medusae closes the life cycle (Lucas et al. 2012).

96

97

### Data collection

98 We cultivated planula larvae, polyps, ephyrae and medusae of *A. aurita* in the laboratories of the  
99 Marine Biological Research Centre, Kerteminde (Denmark), between August 2013 and March  
100 2015. We set up separate experimental series for each life stage using filtered seawater (38  $\mu\text{m}$ )  
101 with a constant salinity of 20 PSU and water temperature between 5 and 22 °C. Temperature  
102 conditions followed seasonal variability of the local temperate climate zone. We obtained  
103 planula larvae from female medusae which we collected in the fjord system Kerteminde  
104 Fjord/Kertinge Nor and the major water system Limfjorden (Denmark) in summer 2014. Directly  
105 after the release of planulae, we individually transferred larvae to small multi-well containers ( $n$   
106 = 960). During daily counts, we determined survival rate and transition rate to the polyp stage by  
107 counting the number of living larvae and the number of larvae that had completed  
108 metamorphosis into polyps. We continued the counts until all larvae had metamorphosed into  
109 polyps or had died. We fed all life stages, except the planula larvae, with low or high amounts  
110 (corresponding to a ratio 1:10) of two-day old *Artemia salina* nauplii and regularly exchanged  
111 the seawater in our cultivation containers. We determined a mean organic weight (= *AFDW*;  
112 Vanhaecke & Sorgeloos 1980) of  $2.8 \pm 1.3 \mu\text{g C ind.}^{-1}$  for each prey organism using the dry  
113 weight (*DW*; 24 h at 60 °C) to ash weight (*AW*; 4 h at 550 °C) ratio of replicate series with 100  
114 individuals each ( $n = 10$ ). We adjusted the amount of carbon added through feeding to the body  
115 size and resulting energy demands of each life stage. Between summer 2013 and summer 2014,

116 we cultivated polyps of *A. aurita* in the laboratory. For this purpose, we initially added planulae,  
117 released by female medusae collected in Kertinge Nor, to small (50 mL) containers with floating  
118 polystyrene substrate plates to facilitate settlement. After 24 h, we removed all but one newly  
119 settled polyp per substrate plate and replaced the seawater in the 50 mL containers. We  
120 subsequently raised and cultivated the individual polyps ( $n = 100$ ) under high and low  
121 concentrations of *A. salina* nauplii. Polyps of *A. aurita* have maximum feeding rates of  $10 \mu\text{g C}$   
122  $\text{ind.}^{-1} \text{d}^{-1}$  (Kamiyama 2011); our high and low food levels hence resembled 1 or  $10 \mu\text{g C ind.}^{-1} \text{d}^{-1}$   
123  $^1$ , respectively. Each week we counted the number of live polyps as well as the number of buds,  
124 podocysts and ephyrae produced by each polyp. To maintain the initial polyp cohorts, we  
125 removed all buds detached from “mother” polyps instantly from substrate plates. During the  
126 whole experimental period, no excystment of polyps from podocysts was observed. During  
127 spring 2014, we individually transferred ephyrae, which were released by polyps under both high  
128 ( $n = 33$ ) and low food level ( $n = 33$ ), to 250 mL flasks with constant water movement and air  
129 supply, and reared them continuously under either high or low concentrations of *A. salina*  
130 nauplii. Food levels for ephyrae corresponded to either minimum energy requirements for  
131 maintenance (low food treatment) or a 10-fold carbon load (high food treatment). Based on  
132 weekly measurements of inter-rhopalia ephyra diameters, we determined size-specific energy  
133 demands to cover minimum energy requirements for maintenance (Frandsen & Riisgård 1997,  
134 Båmstedt et al. 1999). We further calculated the number of food organisms offered to each  
135 ephyra by converting respiratory maintenance costs into energy demands ( $1 \text{ J} = 50 \mu\text{l O}_2$ ; Eckert  
136 et al. 1988), assuming an average energy content of 0.055 J per *A. salina* nauplius (Bengston et  
137 al. 1991). Each week we counted the number of surviving ephyrae and determined the transition  
138 from ephyra to medusa; the latter we defined by the presence of fully developed intermediate

139 lappets and the final closure of adradial clefts. We performed these counts over 5 months until all  
140 ephyrae had either died or completed development into medusae. We tracked the newly  
141 transitioned medusae for an additional 9 months in weekly time intervals. During autumn 2014,  
142 we collected and individually transferred adult, female, larvae-carrying medusae from Kertinge  
143 Nor to 1-L aquaria with constant air supply. We kept these adult medusae either under complete  
144 starvation ( $n = 16$ ) or under food concentrations of  $\sim 1000 \mu\text{g C ind.}^{-1} \text{d}^{-1}$  ( $n = 33$ ) by adding 5  
145 daily rations of 2000 *A. salina* nauplii over a 12-h period followed by 12-h without feeding. We  
146 stopped daily recording of medusa survival after 4 months, when all individuals in the low food  
147 treatment had died; at that time all medusae in the high food treatment were still alive.

148

149

### Estimating stage-specific rates

150 We used the experimental data collected in the lab to parameterize age-stage-structured matrix  
151 population models. For these models, we used discrete time steps of one month to estimate  
152 survival, fecundity, and stage transitions of *A. aurita* between age  $x$  and age  $x+1$ . Stages included  
153 larvae (L), polyps (P), ephyrae (E) and medusae (M). Since the empirical data was either based  
154 on daily (L, M) or weekly records (P, E), we first estimated monthly demographic rates for each  
155 life-stage  $i$  under low and high food conditions, respectively. We determined the fecundity of  
156 polyps under low and high food conditions from monthly budding rates and ephyra release rates.  
157 We estimated the number of planula larvae carried per adult female medusa ( $N_L$ , ind. ind.<sup>-1</sup>)  
158 during the reproductive period (July to November; cf. Goldstein & Riisgård 2016) from average  
159 umbrella diameters ( $d$ , mm) of 40 mm and 200 mm for low and high food conditions,  
160 respectively. In this context, we further used the field observation-based exponential relationship  
161  $N_L = 160.8 \times e^{0.029 \times d}$  (Goldstein & Riisgård 2016). From these numbers of planula larvae carried

162 per medusa, we calculated the daily release of planula larvae ( $\rho$ , ind. ind.<sup>-1</sup> d<sup>-1</sup>) as  $\rho = 0.087 \times N_L$   
163 (Goldstein & Riisgård 2016). We converted the daily release rates into monthly fecundity of  
164 medusae, assuming a sex ratio of 1:1.

165 To convert any of the daily or weekly transition probabilities and fertilities to monthly rates,  
166 we assumed that individuals that died during a given month, had died halfway during this month,  
167 i.e., they have lived half the month on average. This assumption is needed since both transition  
168 and fecundity rates between subsequent time steps depend on survivorship within each monthly  
169 time step, as for instance, a medusa might still release larvae before its death during a given  
170 month. Some ephyrae completed transition to the medusa stage within less than a month after  
171 they were released by a polyp. We therefore corrected the monthly release of ephyrae by polyps  
172 ( $F_{PE}$ ) not only for daily survivorship of ephyrae, but also for the transition probability to the  
173 medusa stage within a given month. Further details on estimating monthly stage-specific  
174 demographic rates of *A. aurita* are given in the Supplement.

175

### 176 **Monthly stage-structured matrix model**

177 Our matrix model included monthly stage-specific vital rates for each of the 12 month of a year.  
178 Age is determined by month, and the final stages are polyp, ephyra, and medusa. Individuals in  
179 each life stage have a certain monthly probability to survive in their current stage  $i$  ( $t_{ii}$ ), or to  
180 transition to another stage  $j$  ( $t_{ij}$ ). Stage transitions are possible from larva to polyp ( $t_{LP}$ , month<sup>-1</sup>)  
181 or from ephyra to medusa ( $t_{EM}$ , month<sup>-1</sup>). Fecundity includes asexual reproduction of polyps by  
182 budding ( $F_{PP}$ , ind. ind.<sup>-1</sup> month<sup>-1</sup>) or release of ephyrae ( $F_{PE}$ , ind. ind.<sup>-1</sup> month<sup>-1</sup>), and sexual  
183 reproduction of medusae by the release of planula larvae ( $F_{ML}$ , ind. ind.<sup>-1</sup> month<sup>-1</sup>; Fig. 1b). Since  
184 larval transition to the polyp stage was very fast (within days or even hours), we linked the



185 monthly transition from larva to polyp stage to fecundity of medusae ( $F_{ML} \times t_{LP}$ ) to build the  
 186 basic structure of an irreducible monthly stage-structured population matrix model (Fig. 1c).  
 187 Using empirical datasets on all demographic rates of *A. aurita* under low and high food  
 188 conditions, respectively, we constructed monthly stage-structured submatrices  $A_x$  ( $3 \times 3$ ) of the  
 189 following structure:

$$A_x = \begin{pmatrix} t_{PP} + F_{PP} & 0 & F_{ML} \times t_{LP} \\ F_{PE} & t_{EE} & 0 \\ F_{PE} \times t_{EM} & t_{EM} & t_{MM} \end{pmatrix},$$

190  
 191 where  $x$  denotes the age in months,  $t_{ij}$  the transition probability from stage  $i$  to  $j$ , with the  
 192 survivorship of stage  $i$  expressed as  $s_i = \sum_{j=1}^i t_{ij}$  and  $F_{ij}$  describes the fecundity of stage  $i$  to  
 193 produce offspring of stage  $j$  (cf. Fig. 1c). Note that parameters  $F_{PE} \times t_{EM}$  and  $F_{ML} \times t_{LP}$  are part  
 194 of the fecundity and not to be considered for estimating survival  $s_i$ . With the 12 monthly  
 195 submatrices (cf. Figs. S1 & S2 in the Supplement), we constructed yearly population projection  
 196 matrices  $A$  ( $36 \times 36$ ; time step = 1 month), one for each food level:

$$A = \begin{pmatrix} \cdot & A_{12} \\ A_1 & \cdot \\ \cdot & A_2 & \cdot \\ \cdot & \cdot & A_3 & \cdot \\ \cdot & \cdot & \cdot & A_4 & \cdot \\ \cdot & \cdot & \cdot & \cdot & A_5 & \cdot \\ \cdot & \cdot & \cdot & \cdot & \cdot & A_6 & \cdot \\ \cdot & \cdot & \cdot & \cdot & \cdot & \cdot & A_7 & \cdot & \cdot & \cdot & \cdot & \cdot & \cdot \\ \cdot & A_8 & \cdot & \cdot & \cdot & \cdot & \cdot \\ \cdot & A_9 & \cdot & \cdot & \cdot & \cdot \\ \cdot & A_{10} & \cdot & \cdot & \cdot \\ \cdot & A_{11} & \cdot & \cdot \end{pmatrix}$$

197

198 In some months we observed no survivorship for ephyrae or medusae, which would lead to  
199 reducible matrices (Caswell 2001); we therefore included a small transition probability of  $10^{-10}$   
200 as placeholder (Figs. S1 & S2 in the Supplement). Our results were robust to this assumption.

201

### 202 **Demographic parameters and population projection**

203 We analyzed our two (low and high food) population projection matrices using R version 3.1.3  
204 (R Core Team 2015) and compared the demographic dynamics of *A. aurita* under both food  
205 levels. We used R packages ‘popbio’ (Stubben & Milligan 2007) and ‘popdemo’ (Stott et al.  
206 2012) to compute population growth rate  $\lambda$  (dominant eigenvalue), stable stage distribution *SSD*  
207 (right eigenvector  $\mathbf{w}$  corresponding to dominant eigenvalue), reproductive value *R* (left  
208 eigenvector  $\mathbf{v}$  corresponding to dominant eigenvalue), the net reproductive rate  $R_0$ , the generation  
209 time, the life expectancy  $e_0$ , and the sensitivity of  $\lambda$  to perturbations of the matrix elements (only  
210 elements  $>0$  are considered). We further used the two matrices to perform life-table response  
211 experiment (LTRE) analysis (Caswell 1996, Tuljapurkar & Caswell 1997) with focus on the  
212 sensitivity of  $\lambda$  to perturbations in stage-specific transitions when comparing high to low food  
213 levels.

214

### 215 **Adjusting matrix parameters with respect to population growth rates**

216 Our matrix model for low food conditions resulted in a population growth rate  $\lambda$  of  $1.32 \text{ month}^{-1}$ .  
217 Such growth rates are not realistic, at least not over extended periods in the field. The  
218 unrealistically high  $\lambda$  reflects our sheltered laboratory environment under which we collected the  
219 data to parameterize the models. As an important microzooplankton component, planula larvae  
220 are highly subject to predation under natural conditions. We therefore reduced the transition rates

221 from larva to polyp of the two annual population matrices to a level that resulted in a stationary  
222 population ( $\lambda = 1 \text{ month}^{-1}$ ) under low food conditions. We applied the same calibration to the  
223 high food condition, leaving us with a still rapidly growing population under high food  
224 conditions.

225

### 226 **Population projection in a climate change scenario**

227 We altered the population matrices to investigate potential effects of climate warming on the  
228 population growth, stable stage distribution, net reproductive rate and life expectancy of *A.*  
229 *aurita*. Increased water temperatures from 5 to 10 °C during winter are predicted to benefit the  
230 production of *A. aurita* ephyrae by extended strobilation periods and enhanced ephyra release per  
231 polyp (Holst 2012). We established such a warming scenario by increasing ephyra production  
232 1.8-fold during the entire strobilation periods (cf. Tables S1 & S2 in the Supplement). We  
233 additionally extended strobilation periods by one month (i.e., January or February for high and  
234 low food conditions, respectively). With these modified matrices we investigated the  
235 demographic effects of a predicted winter warming trend on *A. aurita* populations under low and  
236 high food conditions.

237

## 238 **RESULTS**

### 239 **Demographic dynamics of *Aurelia aurita* under low and high food levels**

240 The metagenic life cycle of *Aurelia aurita* (Fig. 1a) was resembled by cyclic (imprimitive)  
241 structure of our matrix model, expressing annual peak and pit dynamics in projected population  
242 density (Fig. 2). The calibrated population growth rate under 10-fold increased food levels was  $\lambda$   
243 = 1.63  $\text{month}^{-1}$ , indicating a 345-fold yearly increase in population size compared to the

244 calibrated stationary stable population under low food conditions ( $\lambda = 1 \text{ month}^{-1}$ ). Similar to low  
245 food levels, the projection matrix showed cyclic annual structure with typical peak and pit  
246 dynamics in projected population density, but amplitudes of cycles were much increased under  
247 high food availability (Fig. 2a).

248 Under low food conditions, population density increased to a peak during spring and summer  
249 and thereafter decreased to low densities during fall and winter. Under high food levels, peak  
250 density and dynamics differed significantly compared to low food conditions, by showing two  
251 distinct maxima in population density, one during spring and one during autumn, each followed  
252 by a subsequent minimum in summer and winter (Figs. 2a–b). The convergence time to stable  
253 stage, i.e. the damping ratio, of our modelled *A. aurita* population was 59 months (~5 years)  
254 under low food conditions and only 3 months for the high food population.

255 The stable stage distribution under low food availability was vastly dominated by polyps  
256 (~0.94) that survived throughout the year. Ephyrae and medusae accounted for comparatively  
257 small fractions of the population (0.04 and 0.02, respectively) and showed typical seasonal  
258 patterns (Fig. 2b). These included the release of ephyrae during April/May and their survival into  
259 September. Only few ephyrae transitioned to the medusa stage under low food conditions, so that  
260 medusae were present from June to December and contributed only marginally to restocking  
261 polyp densities by the release of planula larvae during autumn and winter. Under high food  
262 supply, the stable stage distribution of the *A. aurita* population was characterized by less polyps  
263 (0.76) compared to low food conditions. Medusae played a more pronounced role (0.2) under  
264 high food levels and ephyrae accounted for a small fraction of the overall population (0.04) due  
265 to faster transition to the medusa stage. Compared to a year-round standing stock of polyps under  
266 low food conditions, the stable stage distribution under high food levels was characterized by

267 lower proportions of polyps, which were predominant from September to March. Ephyrae were  
268 released in March/April, and medusae dominated the *A. aurita* population from April to June  
269 under high food levels. In autumn, the release of planula larvae restocked the polyp fraction (Fig.  
270 2b).

271 Our findings illustrate a shift from polyp-dominated *A. aurita* populations towards more  
272 medusae under increased food conditions (see Table S3 in the Supplement). The reproductive  
273 value describes the contribution of an individual in a given stage to future generations. It was  
274 low for ephyrae (0.03) under low food conditions, and sexual reproduction of medusae  
275 contributed about half as much (0.42) compared to the asexually reproducing polyp stage (1; the  
276 reproductive values are scaled for January). The importance of the medusa stage under high food  
277 conditions was reflected in a reproductive value that increased to 0.27 for ephyrae and to 9.13 for  
278 medusae (note scaling to 1 for polyps in January). A net reproductive rate of 1 indicated that  
279 each polyp is replaced by 1 new polyp at the end of its life under low food conditions which  
280 resulted in long generation times of (200 months) ~16.7 years. Under high food levels, the net  
281 reproductive rate increased to 57 polyps replacing each polyp at the end of its life, highlighting  
282 the production of increased numbers of offspring compared to low food conditions. Due to this  
283 high net reproductive rate, high food conditions also boosted the average time between two  
284 consecutive generations to 8 months.

285 Life expectancy of polyps, estimated from the fundamental matrix as the mean time to death,  
286 was 33 years under low food conditions, while ephyrae and medusae revealed much shorter life  
287 expectancies of 2 and 3 months, respectively. In consensus with a more pronounced impact of  
288 the medusa stage on population structure under high food levels, life expectancy of polyps

289 decreased to 7 years, while the length of ephyra and especially medusa lives extended to 3 and 8  
290 months, respectively (cf. Table S3 in the Supplement).

291 Population growth  $\lambda$  under low food conditions was most sensitive to changes in polyp  
292 survival ( $s_P = t_{PP}$ ), with constantly high sensitivity of 0.08 throughout the months of the year  
293 (Fig. 2c). Sensitivity analysis further highlighted a lower influence of fecundity on growth rates  
294 compared to survival rates. We detected sensitivities of  $\lambda$  between 0.01 and 0.02 for  
295 perturbations in ephyra production ( $F_{PE}$ ) from March to May and of 0.01 to 0.05 for perturbed  
296 transition probability from ephyra to medusa ( $t_{EM}$ ) from March to June. Under high food  
297 conditions, the estimated sensitivity of  $\lambda$  was generally higher than under low food levels. The  
298 population growth rate was most sensitive to changes in medusa survival, with sensitivity  
299 remaining high, in a range of 0.07 to 0.16 from April to October, and reaching a maximum of  
300 0.32 from June to July when medusa survival decreased. Changes in polyp survival affected  $\lambda$   
301 particularly from October to April, with sensitivities ranging from 0.04 to 0.13. To investigate  
302 differences in the sensitivity of  $\lambda$  between food treatments, we performed a life table response  
303 experiment (LTRE) analysis. Our results showed a maximum sensitivity of 0.14 for the transition  
304 from ephyra to medusa stage in April/May, followed by high sensitivities of 0.08 for medusa  
305 survival in the same time period. We further observed high sensitivities of 0.05 to 0.07 for  
306 combined larva production and subsequent transition to the polyp stage from August to  
307 December (Table S4 in the Supplement).

308

### 309 **Effects of climate change**

310 For our winter warming scenario with extended strobilation periods and increased ephyra  
311 release, population growth rates of *A. aurita* increased to 1.03 month<sup>-1</sup> and 1.65 month<sup>-1</sup> under

312 low and high food conditions, corresponding to relative monthly increases of 2.5 and 1.3 %,  
313 respectively. The projected winter warming trend enhanced the variability in inter-annual  
314 population structure in both food treatments. We also observed slightly more distinct peak and  
315 pit dynamics in population density (Fig. 2a). The stable population structure of *A. aurita* we  
316 predicted for winter warming shifted slightly towards ephyrae (0.08) and medusae (0.03), with  
317 polyps still dominating (0.9) under low food levels (Fig. 2b). In relative terms, we observed 1.2  
318 % more medusae, 3.8 % more ephyrae and 5.0 % less polyps per year. Under high food levels,  
319 our increased winter temperature scenario shifted the stable stage distribution to 9.9 % more  
320 medusae, 2.3 % less ephyrae and 7.6 % less polyps (see Table S5 in the Supplement). As a  
321 consequence of an earlier onset of strobilation periods in the scenario, fast transition of ephyrae  
322 resulted in significant proportions of medusae already present in February and March under high  
323 food levels (Fig. 2b).

324 Our winter warming scenario further increased reproductive values in both ephyrae and  
325 medusae by enhancing their relative contributions to the number of offspring of future  
326 generations by 4.3 % and 0.2 % per year under low and by 5.1 % and 2.8 % per year under high  
327 food levels, respectively. We found that winter warming increased the net reproductive rate by  
328 1.35 polyps replacing every polyp at the end of its life under low food conditions, which  
329 corresponds to a relative difference of 35 %. Under high food conditions, we found a net  
330 reproductive rate of 62, indicating a relative increase by 8 % as a result of higher winter  
331 temperatures. The generation time under low food conditions was shortened to 12.3 years,  
332 corresponding to a difference of 4.4 years made up by the projected winter warming trend, while  
333 generation times were only marginally shortened by 2 days under high food conditions. Winter  
334 warming increased life expectancy of ephyrae by 12 day and 19 days, respectively (Table S5 in

335 the Supplement), whereas life expectancy of polyps and medusae remained unchanged under  
336 both low and high food levels.

337

338

## DISCUSSION

339 We reveal the demographic dynamics and life history shifts underlying jellyfish blooms and  
340 show that the intensity and frequency of jellyfish booms and busts is subject to specific  
341 ecological triggers. We illustrate that the typical peak and pit dynamics of jellyfish populations  
342 are significantly enhanced by natural variations in the food regime, while other ecological  
343 changes, such as a predicted winter warming, has a comparatively low impact on the  
344 development of jellyfish blooms. Despite our winter warming scenario causing substantial  
345 changes in population stage structure and dynamics, it is not sufficient to shift the predominant  
346 mode of reproduction from asexual to sexual. We suggest this latter shift from polyp- to medusa-  
347 dominated populations as a key mechanism causing jellyfish outbreaks. Our findings support  
348 several previous studies which have identified metagenic life cycles as the base for boom and  
349 bust population dynamics (Hamner & Dawson 2008, Pitt et al. 2008, Brotz et al. 2012). Since  
350 jellyfish blooms have been suggested as indicators for ocean degradation (Schrope 2012), the  
351 present insights may provide important basic knowledge regarding the health of ecosystems  
352 worldwide.

353

354

### **The demographic dynamics behind jellyfish blooms**

355 Our findings suggest food availability as a major constraint for the intensity and frequency of  
356 jellyfish blooms, confirming recent observations that have pointed out food supply as limiting  
357 factor for the development of ephyrae (Fu et al. 2014) as well as the survivorship and fecundity



358 of medusae (Goldstein & Riisgård 2016). Further, prey removal has been suggested as highly  
359 efficient management strategy in reducing the population size of cubomedusae (Bordehore et al.  
360 2015). Yet, to our knowledge, we present the first comprehensive quantitative study of how  
361 increased food availability can trigger demographic changes in *Aurelia aurita* populations. Such  
362 changes include sharpened seasonal dynamics and shorter generation times of the pelagic  
363 medusa stage. We show that jellyfish blooms are a natural consequence of complex life cycles  
364 and confirm the key role of benthic polyps in ensuring long-term survival of *A. aurita*  
365 populations (Boero et al. 2008, Lucas et al. 2012), particularly when food is scarce. Increased  
366 food levels are associated with boosted population growth and dramatic life history shifts in *A.*  
367 *aurita*, as expressed by longer-lived medusae with enhanced release of planula larvae, increased  
368 ephyra production, as well as faster and more successful development of ephyrae into medusae.  
369 Our study provides important basic knowledge on the consequences of habitat eutrophication in  
370 context with jellyfish blooms, as investigated food levels are motivated by eutrophic to  
371 hypereutrophic conditions (cf. Riisgård et al. 2008) which are observed in our study areas  
372 Kerteminde Fjord/Kertinge Nor (Olesen et al. 1994, Nielsen et al. 1997) and Limfjorden (Møller  
373 & Riisgård 2007, Riisgård et al. 2012b).

374 Indicated by our life table response experiment analysis, which showed high sensitivities for  
375 the fecundity of medusae combined with the transition from larvae to polyps, an increased  
376 natural mortality risk is especially likely for the planktonic planula stage of *A. aurita* (cf. Lucas  
377 2001). A transition probability of  $0.001 \text{ month}^{-1}$  from larva to polyp matches well previous  
378 estimates (Xie et al. 2015) and was used to calibrate our presented matrix models for the *A.*  
379 *aurita* population under low and high food conditions. Our resulting stable population under low  
380 food levels is comparable to the local *A. aurita* jellyfish population in the semi-enclosed fjord

381 system Kerteminde Fjord/Kertinge Nor, which has remained unchanged over the last 24 years  
382 (Olesen et al. 1994, Nielsen et al. 1997, Riisgård et al. 2010, Goldstein & Riisgård 2016). The  
383 rapid growth potential we show for our calibrated jellyfish population under constantly high food  
384 (optimum) conditions however is in contrast to rather low abundances of *A. aurita* medusae  
385 observed in open coastal waters (Møller 1980, Goldstein & Riisgård 2016) or in Limfjorden  
386 (Hansson et al. 2005, Møller & Riisgård 2007), where *A. aurita* may currently experience the  
387 process of being outcompeted by the invasive ctenophore *Mnemiopsis leidyi* (Riisgård et al.  
388 2015). This implies additional factors regulating polyp, ephyra and medusa density in less  
389 protected ecosystems. According to our model for high food levels, an increased polyp mortality  
390 of  $0.3 \text{ d}^{-1}$  (Xie et al. 2015; i.e., a survivorship of  $2.3 \times 10^{-5} \text{ month}^{-1}$ ) would decrease population  
391 growth rates to  $1.44 \text{ month}^{-1}$ . Reduced medusa survival to  $0.1 \text{ month}^{-1}$  (corresponding to a  
392 mortality of  $0.07 \text{ d}^{-1}$ ; cf. Xie et al. 2015, Table 1 therein) or alternatively, a lowered transition  
393 probability from ephyra to medusa stage to  $0.0001 \text{ month}^{-1}$ , would result in remarkably  
394 decelerated population growth rates of  $\lambda = 1.10 \text{ month}^{-1}$  and  $1.09 \text{ month}^{-1}$ , respectively. Since  
395 population growth of *A. aurita* is less dependent on the survival of benthic polyps under  
396 increased food levels, our estimates suggest that transition from ephyra to medusa stage and  
397 survival of medusae are the most critical parameters for the development of jellyfish blooms in  
398 exposed coastal regions. This finding is additionally supported by the results of our life table  
399 response experiment analysis.

400 Besides food availability, intra- and inter-specific competition, predation (Kakinuma 1975,  
401 Hernroth & Gröndahl 1985, Hansson 1997, Arai 2005), substrate availability, hydrodynamic  
402 currents (Johnson et al. 2001, Xie et al. 2015) and extreme environmental conditions (Lucas et  
403 al. 2012) should be considered as important constraints for the development of jellyfish blooms.

404 In particular, population density-dependent mechanisms controlling individual size (Schneider &  
405 Behrends 1994, Lucas 2001, Riisgård et al. 2010, Goldstein & Riisgård 2016) could further play  
406 a major role for the demography of *A. aurita*. Especially size-structure should hence be taken  
407 into account in future population models (cf. Bordehore et al. 2015) to evaluate the importance  
408 of individual density for the development of jellyfish blooms.

409

### 410 **Climate change and jellyfish blooms**

411 Warm temperature can lead to enhanced asexual reproduction and has therefore been associated  
412 with greater numbers of medusae for most temperate scyphozoan species (Purcell 2005). Our  
413 findings do not support rather qualitative arguments about increased water temperature boosting  
414 the boom and bust dynamics of jellyfish blooms (Richardson et al. 2009, Xie et al. 2016). At  
415 least winter warming has comparatively weak effects on the growth of *A. aurita* populations due  
416 to resulting seasonal changes in population composition and structure. Our winter warming  
417 scenario led to only slightly enhanced seasonal variability in population structure which involved  
418 changes towards less polyps and more medusae but did not cause a shift from asexual polyp- to  
419 sexual medusa-dominated *A. aurita* populations as observed under increased food conditions.  
420 Winter warming however can increase the population growth of temperate jellyfish populations,  
421 which may be especially pronounced for populations in regions with limited food availability. As  
422 a consequence of enhanced strobilation periods and increased numbers of ephyrae released per  
423 polyp (Holst 2012), warmer winter temperatures shorten generation times due to more medusae  
424 with increased reproductive value. Climate warming has previously been suggested to benefit the  
425 population size of temperate scyphozoan species, but not tropical or boreal species (Holst 2012,  
426 Purcell et al. 2012). Based on recent climate analyses, rises in sea surface temperature by 5 °C

427 are expected within the next 100 years (Belkin 2009). Our results indicate a maximum increase  
428 in jellyfish density by 1.1 during this warming period, while long-term observations in Kertinge  
429 Nor have shown that fluctuations by a factor of up to 1.6 are common among years (Olesen et al.  
430 1994, Riisgård et al. 2010, Goldstein & Riisgård 2016). Further taking into account the  
431 requirement of a cold trigger to stimulate strobilation in *A. aurita* (Holst 2012), we suggest that  
432 winter warming has marginal effects compared to regionally observed increases in food level.

433

434

## CONCLUSIONS

435 Our study highlights that food availability drives and specifically shapes the booms and busts of  
436 jellyfish blooms. We show that predicted changes in water temperature likely cause much less  
437 dramatic increases in the density of *Aurelia aurita* medusae than already established food  
438 concentrations in several eutrophic regions around the world. The importance of natural  
439 competitors and predators for keeping jellyfish blooms in check needs further exploration, but  
440 our findings might serve as a promising starting point. We conclude that a combination of  
441 environmental triggers, such as habitat eutrophication, overfishing, artificial settlement substrates  
442 and climate change, can promote jellyfish outbreaks severely. Our findings emphasize the  
443 fundamental importance of an integral, quantitative view on jellyfish life histories. We believe  
444 such inclusive knowledge, comprising species-specific, life stage-specific and age-specific traits,  
445 is an inevitable prerequisite in providing perspective for future management of jellyfish blooms.

446

447 *Acknowledgements.* We thank Kim Lundgreen for technical assistance and are grateful to Hans  
448 Ulrik Riisgård, Hal Caswell, Iain Stott, Cesar Bordehore, Per Andersen, Owen Jones and Cathy

449 H. Lucas for comments and/or discussions. This study was financially supported by the Max-  
450 Planck Society (Max-Planck Odense Center on the Biodemography of Aging, Denmark).

451

452

## REFERENCES

453 Arai MN (2005) Predation on pelagic coelenterates: a review. *J Mar Biol Assoc UK* 85:523–536

454 Arai MN (2009) The potential importance of podocysts to the formation of scyphozoan blooms:

455 a review. In: Purcell JE, Pitt KA (eds) *Jellyfish Blooms: Causes, Consequences, and Recent*

456 *Advances*. Springer, Netherlands, p 241–246

457 Båmstedt U, Lane J, Martinussen MB (1999) Bioenergetics of ephyra larvae of the scyphozoan

458 jellyfish *Aurelia aurita* in relation to temperature and salinity. *Mar Biol* 135:89–98

459 Belkin IM (2009) Rapid warming of large marine ecosystems. *Prog Oceanogr* 81:207–213

460 Bengtson DA, Leger P, Sorgeloos P (1991) Use of *Artemia* as a food source for aquaculture. In:

461 Browne RA, Sorgeloos P, Trotman CAN (eds) *Artemia Biology*. CRC Press, Boca Raton,

462 Florida, USA, p 255–285

463 Boero F, Bouillon J, Gravili C, Miglietta MP, Parsons T, Piraino S (2008) Gelatinous plankton:

464 irregularities rule the world (sometimes). *Mar Ecol Prog Ser* 356:299–310

465 Bordehore C, Fuentes VL, Segarra JG, Acevedo M, Canepa A, Raventós J (2015) Use of an

466 inverse method for time series to estimate the dynamics of and management strategies for the

467 box jellyfish *Carybdea marsupialis*. *PLOS ONE* 10:e0137272, doi:

468 10.1371/journal.pone.0137272

469 Brotz L, Cheung WW, Kleisner K, Pakhomov E, Pauly D (2012) Increasing jellyfish

470 populations: trends in large marine ecosystems. *Hydrobiologia* 690:3–20

- 471 Caswell H (1996) Analysis of life table response experiments II. Alternative parameterizations  
472 for size-and stage-structured models. *Ecol Modell* 88:73–82
- 473 Caswell H (2001) Matrix population models: construction, analysis, and interpretation. Sinauer  
474 Associates, Sunderland, Massachusetts, USA
- 475 Dawson MN (2003) Macro-morphological variation among cryptic species of the moon jellyfish,  
476 *Aurelia* (Cnidaria: Scyphozoa). *Mar Biol* 143:369–379
- 477 Eckert R, Randall D, Augustine G (1988) Animal energetics and temperature relations. In:  
478 Eckert R, Augustine G (eds) *Animal Physiology, Mechanisms and Adaptions*. WH Freeman  
479 and Company, USA, p 555–605
- 480 Frandsen KT, Riisgård HU (1997) Size dependent respiration and growth of jellyfish, *Aurelia*  
481 *aurita*. *Sarsia* 82:307–312
- 482 Fu Z, Shibata M, Makabe R, Ikeda H, Uye SI (2014) Body size reduction under starvation, and  
483 the point of no return, in ephyrae of the moon jellyfish *Aurelia aurita*. *Mar Ecol Prog Ser*  
484 510:255–263
- 485 Goldstein J, Riisgård HU (2016) Population dynamics and factors controlling somatic degrowth  
486 of the common jellyfish, *Aurelia aurita*, in a temperate semi-enclosed cove (Kertinge Nor,  
487 Denmark). *Mar Biol* 163:33–44
- 488 Grøndahl F (1989) Evidence of gregarious settlement of planula larvae of the scyphozoan  
489 *Aurelia aurita*: An experimental study. *Mar Ecol Prog Ser* 56:119–125
- 490 Hamner WM, Dawson MN (2008) A review and synthesis on the systematics and evolution of  
491 jellyfish blooms: advantageous aggregations and adaptive assemblages. In: Purcell JE, Pitt  
492 KA (eds) *Jellyfish Blooms: Causes, Consequences, and Recent Advances*. Springer,  
493 Netherlands, p 161–191

- 494 Hamner WM, Jenssen RM (1974) Growth, degrowth, and irreversible cell differentiation in  
495 *Aurelia aurita*. *Am Zool* 14:833–849
- 496 Hansson LJ (1997) Capture and digestion of the scyphozoan jellyfish *Aurelia aurita* by *Cyanea*  
497 *capillata* and prey response to predator contact. *J Plankton Res* 19:195–208
- 498 Hansson LJ, Moeslund O, Kiørboe T, Riisgård HU (2005) Clearance rates of jellyfish and their  
499 potential predation impact on zooplankton and fish larvae in a neritic ecosystem (Limfjorden,  
500 Denmark). *Mar Ecol Prog Ser* 304:117–131
- 501 Hernroth L, Gröndahl F (1985) On the biology of *Aurelia aurita* (L.) 3. Predation by *Coryphella*  
502 *verrucosa* (Gastropoda, Opisthobranchia), a major factor regulating the development of  
503 *Aurelia* populations in the Gullmar Fjord, western Sweden. *Ophelia* 24:37–45
- 504 Holst S (2012) Effects of climate warming on strobilation and ephyra production of North Sea  
505 scyphozoan jellyfish. *Hydrobiologia* 690:127–140
- 506 Holst S, Jarms G (2007) Substrate choice and settlement preferences of planula larvae of five  
507 Scyphozoa (Cnidaria) from German Bight, North Sea. *Mar Biol* 151:863–871
- 508 Ishii H, Takagi A (2003) Development time of planula larvae on the oral arms of the  
509 scyphomedusa *Aurelia aurita*. *J Plankton Res* 25:1447–1450
- 510 Ishii H, Watanabe T (2003) Experimental study of growth and asexual reproduction in *Aurelia*  
511 *aurita* polyps. *Sessile Organisms* 20:69–73
- 512 Johnson DR, Perry HM, and Burke WD (2001) Developing jellyfish strategy hypotheses using  
513 circulation models. *Hydrobiologia* 451:213–221
- 514 Kakinuma Y (1975) An experimental study of the life cycle and organ differentiation of *Aurelia*  
515 *aurita* Lamarck. *Bulletin of the Marine Biological Station of Asamushi* 15:101–113

- 516 Kamiyama T (2011) Planktonic ciliates as a food source for the scyphozoan *Aurelia aurita* (s.l.):  
517 Feeding activity and assimilation of the polyp stage. *J Exp Mar Biol Ecol* 407:207–215
- 518 Keen SL (1987) Recruitment of *Aurelia aurita* (Cnidaria: Scyphozoa) larvae is position-  
519 dependent, and independent of conspecific density, within a settling surface. *Mar Ecol Prog*  
520 *Ser* 38:151–160
- 521 Liu WC, Lo WT, Purcell JE, Chang HH (2009) Effects of temperature and light intensity on  
522 asexual reproduction of the scyphozoan, *Aurelia aurita* (L.) in Taiwan. *Hydrobiologia*  
523 616:247–258
- 524 Lucas CH (2001) Reproduction and life history strategies of the common jellyfish, *Aurelia*  
525 *aurita*, in relation to its ambient environment. *Hydrobiologia* 451:229–246
- 526 Lucas CH, Graham WM, Widmer C (2012) Jellyfish Life Histories: Role of Polyps in Forming  
527 and Maintaining Scyphomedusa Populations. *Adv Mar Biol* 63: 133–196
- 528 Möller H (1980) Population dynamics of *Aurelia aurita* medusae in Kiel Bight, Germany (FRG).  
529 *Mar Biol* 60:123–128
- 530 Møller LF, Riisgård HU (2007) Population dynamics, growth and predation impact of the  
531 common jellyfish *Aurelia aurita* and two hydromedusae (*Sarsia tubulosa* and *Aequorea*  
532 *vitrina*) in Limfjorden (Denmark). *Mar Ecol Prog Ser* 346: 153–165
- 533 Nielsen AS, Pedersen AW, Riisgård HU (1997) Implications of density driven currents for  
534 interaction between jellyfish (*Aurelia aurita*) and zooplankton in a Danish fjord. *Sarsia*  
535 82:297–305
- 536 Olesen NJ, Frandsen K, Riisgård HU (1994) Population Dynamic, Growth and Energetics of  
537 Jellyfish, *Aurelia aurita*, in a Shallow Fjord. *Mar Ecol Prog Ser* 105:9–18



- 538 Pitt KA, Welsh DT, Condon RH (2008) Influence of jellyfish blooms on carbon, nitrogen and  
539 phosphorus cycling and plankton production. In: Purcell JE, Pitt KA (eds) Jellyfish Blooms:  
540 Causes, Consequences, and Recent Advances. Springer, Netherlands, p 133–149
- 541 Purcell JE (2005) Climate effects on formation of jellyfish and ctenophore blooms: a review. J  
542 Mar Biol Assoc UK 85:461–476
- 543 Purcell JE (2012) Jellyfish and ctenophore blooms coincide with human proliferations and  
544 environmental perturbations. Annu Rev Mar Sci 4:209–235
- 545 Purcell JE, Uye SI, Lo WT (2007) Anthropogenic causes of jellyfish blooms and their direct  
546 consequences for humans: a review. Mar Ecol Prog Ser 350:153–174
- 547 Purcell JE, Atienza D, Fuentes VL, Olariaga A, Tilves U, Colahan C, Gili JM (2012)  
548 Temperature effects on asexual reproduction rates of scyphozoan species from the northwest  
549 Mediterranean Sea. Hydrobiologia 690:169–180
- 550 R Core Team (2015) R: A language and environment for statistical computing. R Foundation for  
551 Statistical Computing, Vienna, Austria. <http://www.r-project.org>
- 552 Richardson AJ, Bakun A, Hays GC, Gibbons MJ (2009) The jellyfish joyride: causes,  
553 consequences and management responses to a more gelatinous future. Trends Ecol Evol  
554 24:312–322
- 555 Riisgård HU, Jensen MH, Rask N (2008) Odense Fjord and Kerteminde Fjord/Kertinge Nor.  
556 Ecology of Baltic Coastal Waters. Springer Berlin Heidelberg
- 557 Riisgård HU, Barth-Jensen C, Madsen CV (2010) High abundance of the jellyfish *Aurelia aurita*  
558 excludes the invasive ctenophore *Mnemiopsis leidyi* to establish in a shallow cove (Kertinge  
559 Nor, Denmark). Aquat Invasions 5:347–356

- 560 Riisgård HU, Madsen CV, Barth-Jensen C, Purcell JE (2012a) Population dynamics and  
561 zooplankton-predation impact of the indigenous scyphozoan *Aurelia aurita* and the invasive  
562 ctenophore *Mnemiopsis leidyi* in Limfjorden (Denmark). *Aquat Invasions* 7:147–162
- 563 Riisgård HU, Jaspers C, Serre S, Lundgreen K (2012b) Occurrence, inter-annual variability and  
564 zooplankton-predation impact of the invasive ctenophore *Mnemiopsis leidyi* and the native  
565 jellyfish *Aurelia aurita* in Limfjorden (Denmark) in 2010 and 2011. *Bioinvasions Rec*  
566 1:145–159
- 567 Riisgård HU, Goldstein J, Lundgreen K, Luskow F (2015) Jellyfish and Ctenophores in the  
568 Environmentally Degraded Limfjorden (Denmark) During 2014 – Species Composition,  
569 Population Densities and Predation Impact. *Fish Aquac J* 6:137–146
- 570 Sanz-Martín M, Pitt KA, Condon RH, Lucas CH, Novaes de Santana C, Duarte CM (2016)  
571 Flawed citation practices facilitates the unsubstantiated perception of a global trend toward  
572 increased jellyfish blooms. doi: 10.1111/geb.12474
- 573 Schneider G (1989) The common jellyfish *Aurelia aurita*: standing stock, excretion and nutrient  
574 regeneration in the Kiel Bight, Western Baltic. *Mar Biol* 100:507–514
- 575 Schneider G, Behrends G (1994) Population dynamics and the trophic role of *Aurelia aurita*  
576 medusae in the Kiel Bight and western Baltic. *ICES J Mar Sci* 51:359–367
- 577 Schrope M (2012) Marine ecology: attack of the blobs. *Nature* 482:20–21
- 578 Stott I, Hodgson DJ, Townley S (2012) popdemo: an R package for population demography  
579 using projection matrix analysis. *Methods Ecol Evol* 3:797–802
- 580 Stubben CJ, Milligan BG (2007) Estimating and Analyzing Demographic Models Using the  
581 popbio Package in R. *J Stat Softw* 22:1–23.

- 582 Tuljapurkar S, Caswell H (1997) Structured-population models in marine, terrestrial, and  
583 freshwater systems. Springer Science & Business Media
- 584 Vanhaecke P, Sorgeloos P (1980) International Study on *Artemia*. IV. The biometrics of *Artemia*  
585 strains from different geographical origin. The brine shrimp *Artemia* 3:393–405
- 586 Xie C, Fan M, Wang X, Chen M (2015) Dynamic Model for Life History of Scyphozoa. PLOS  
587 ONE 10, doi: 10.1371/journal.pone.0130669

588

FIGURES

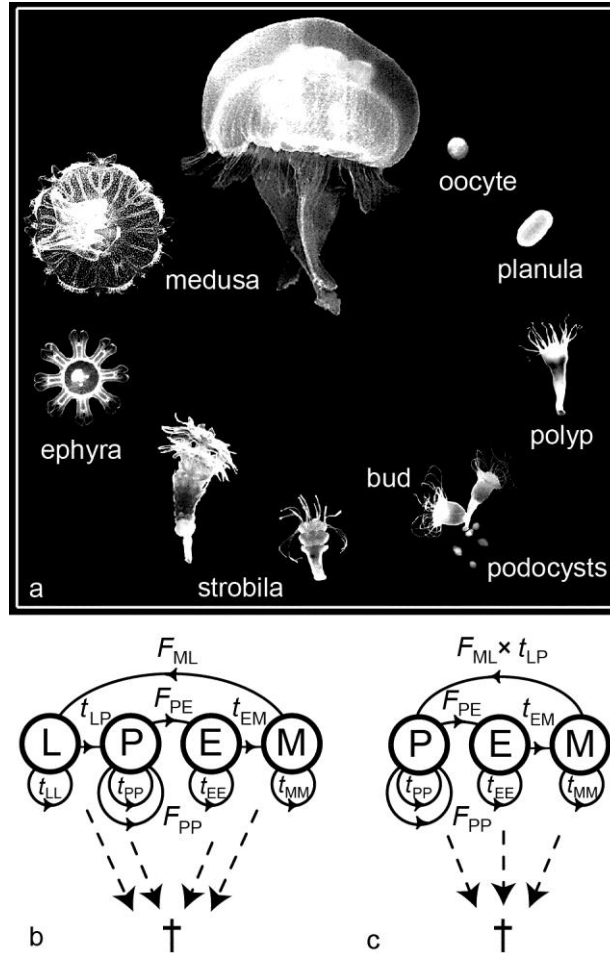

589

590 Fig. 1. Life history of the common jellyfish *Aurelia aurita* (Scyphozoa, Cnidaria). (a) Metagenic  
 591 life cycle with alternation of generations between the sexually reproducing medusa and the  
 592 asexually reproducing polyp stage. (b) Life cycle graph for *A. aurita*, including transition  
 593 probability  $t$ , fecundity  $F$  (solid arrows) and mortality  $\dagger$  (broken arrows) of all life stages, i.e.,  
 594 planula larva (L), polyp (P), ephyra (E) and medusa (M). (c) Reduced life cycle graph for polyps,  
 595 ephyrae and medusae considering fast (daily) transition from larva to polyp stage.

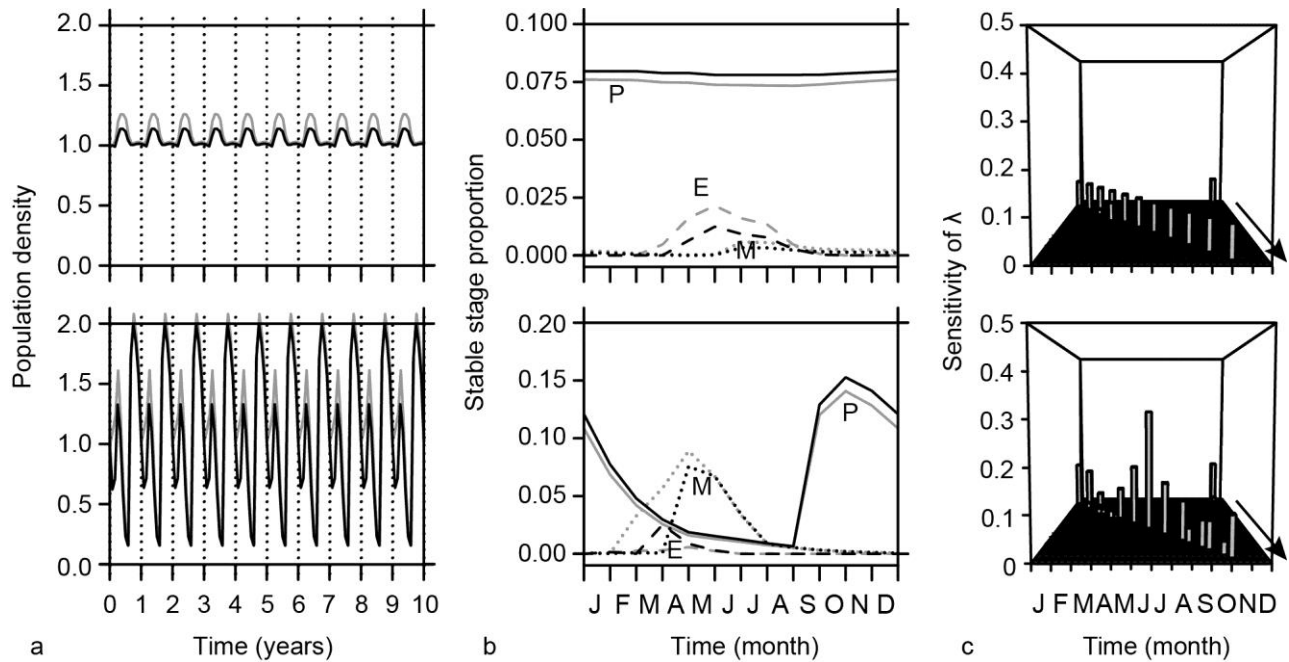

596

597 Fig. 2. Population matrix model for *Aurelia aurita* under low (upper panels) and high food  
598 (lower panels) conditions (1:10). (a) Matrix projection over a 10-year period (dotted lines),  
599 standardized to the long-term effects of population growth rates  $\lambda = 1 \text{ month}^{-1}$  and  $\lambda = 1.63$   
600  $\text{month}^{-1}$ , respectively, for present temperature conditions (solid black lines) and for a predicted  
601 winter warming trend (solid grey lines). (b) Stable stage proportion of polyps (P), ephyrae (E)  
602 and medusae (M) for present temperature conditions (black lines) and for a winter warming  
603 scenario (gray lines). (c) Sensitivity of  $\lambda$  to changes in monthly stage transitions.
